# Supplementary material
Source: PubMed Central journal article supplement (PMC3525720)
Supplement: NIHMS393884-supplement-1.pdf [file NIHMS393884-supplement-1.pdf]

1 **Supplementary File**

2

3 **Supplementary Figure S1**

4

5

6

7

8

9

10

11

12 **Supplementary Figure S1.** No significant changes in the levels of *Vegfa* (A) and *Vegfb* (B)  
13 were observed in the wild type mouse granulosa cells with *Smad1/5* knockdown.

14

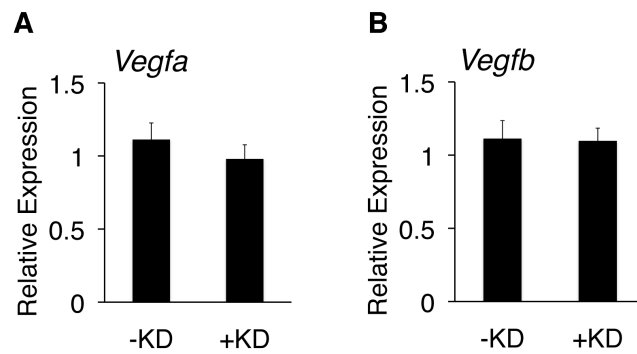

14 **Supplementary Figure S2**

15

16

17

18

19

20

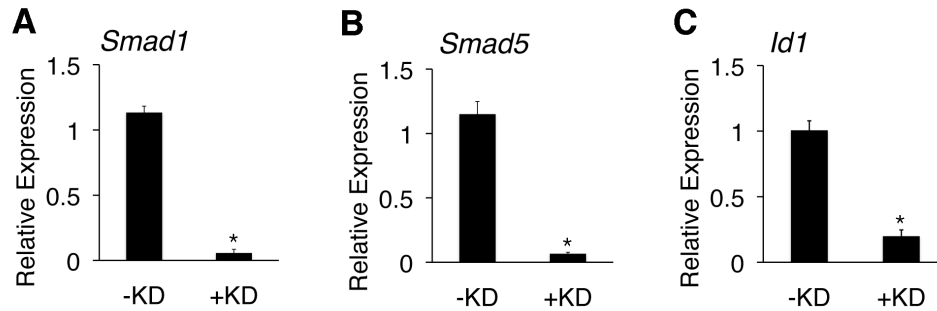

21

22

23 **Supplementary Figure S2.** Loss of *Smad1* and *Smad5* results in the downregulation of *Id1* gene

24 expression. siRNA-mediated knockdown (+KD) of *Smad1* and *Smad5* in mouse granulosa cells

25 resulted in a significant reduction in *Smad1* (A) and *Smad5* (B) transcript levels compared to the

26 control (scrambled siRNA) transfected cells (-KD). A significant decrease in *Id1* (C) expression

27 is observed following *Smad1/5* knockdown. Asterisks indicate statistical significance (n=4;  $P <$

28 0.05).

29

29 **Supplementary Figure S3**

30

32

34

36

37

38

39

40

41

42

43

44 **Supplementary Figure S3.** Loss of SMAD1/5 results in the upregulation of PDGFA. Western

45 blot analysis of whole cell lysates harvested from COV434 cells transfected with siRNA to

46 SMAD1 and SMAD5. siRNA-mediated knockdown (+KD) of *Smad1* and *Smad5* in mouse

47 granulosa cells resulted in a significant reduction in SMAD1/5 and upregulation of PDGFA

48 protein levels compared to the control (scrambled siRNA) transfected cells (-KD). The

49 membrane was stripped and reprobbed with anti-actin antibody to ensure equal protein loading.

50

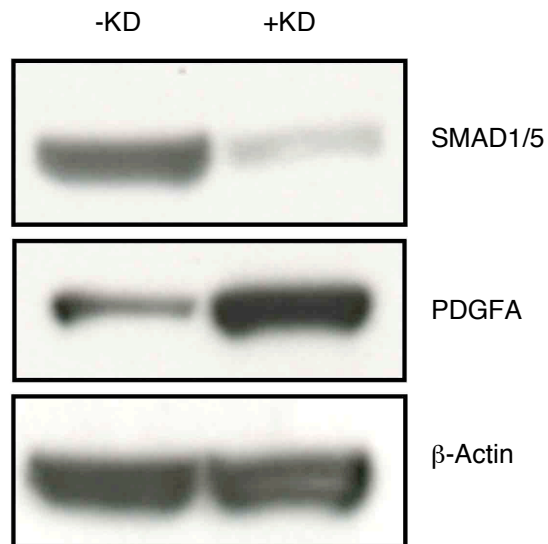

50 **Supplementary Figure S4**

51

52

53

54

55

56

57

58

59

60

61

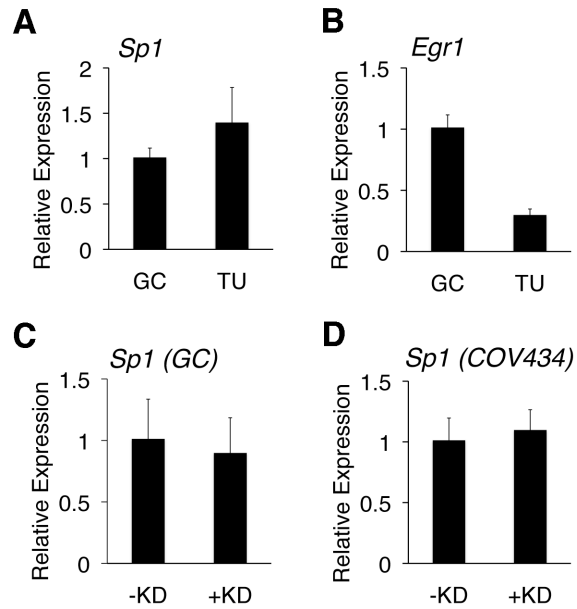

62 **Supplementary Figure S4.** Expression analysis of *Sp1* and *Egr1*. Quantitative PCR was used  
63 to determine expression levels of *Sp1* (A) and *Egr1* (B) in wild type mouse granulosa cells (GC)  
64 and *Smad1/5* dKO tumors (TU). No significant change is observed in the levels of *Sp1* wild  
65 type mouse granulosa cells (C) or COV434 cells (D) following *Smad1/5* knockdown (+KD)  
66 compared to control siRNA transfected cells (-KD)

67

67 **Supplementary Figure S5**

68

69

70

71

72

73

74

75

76

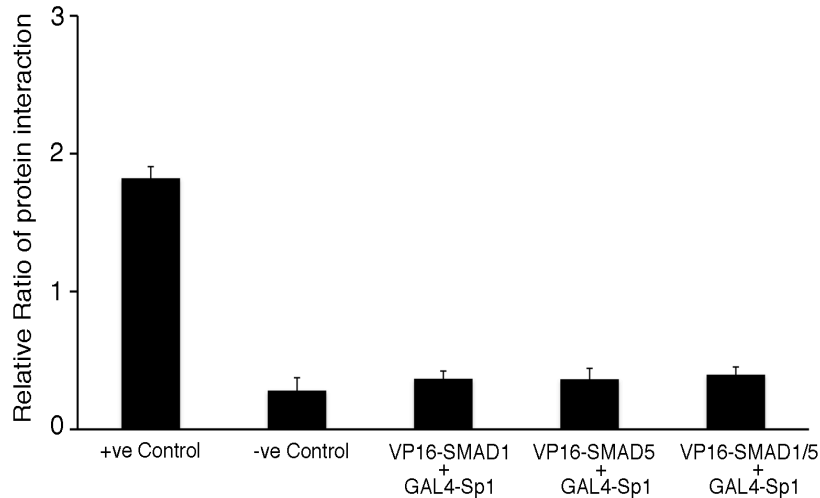

77 **Supplementary Figure S5.** Mammalian two-hybrid assay indicates that BR-SMADs do not

78 interact with Sp1. COV434 cells were transiently transfected with the respective plasmids

79 indicated in the figure. pACT-MyoD and pBIND-Id provided in the kit served as positive

80 control (+ve con) where as empty pACT and pBIND, which lack fusion proteins, were used as

81 negative controls (-ve con) for protein interaction. No interaction was observed in the cells co-

82 transfected pACT vector expressing SMAD1 and SMAD5 fused to a transcriptional activation

83 domain (VP16-SMAD1 and VP16-SMAD5) and the pBIND vector expressing Sp1 fused to a

84 DNA-binding domain (GAL4-Sp1). YFP was used for the normalization of the transfections.

85 The relative interaction of proteins is determined by the mCherry/YFP ratio. Experiments were

86 repeated three times with same results.

87

88

88 **Supplementary Table 1**

89

90

| Gene Name    | Species | Primer Name              | Primer Sequence (5' to 3') | Application   |
|--------------|---------|--------------------------|----------------------------|---------------|
| <i>Smad1</i> | Mouse   | m <i>Smad1</i> -Sybr For | GCTTCGTGAAGGGTTGGGG        | Real-time PCR |
|              |         | m <i>Smad1</i> -Sybr Rev | CGGATGAAATAGGATTGTGGGG     |               |
| <i>Smad5</i> | Mouse   | m <i>Smad5</i> -Sybr For | TTGTCAGAGTAGGAACTGCAAC     | Real-time PCR |
|              |         | m <i>Smad5</i> -Sybr Rev | GAAGCTGAGCAAACCTCTGAT      |               |
| <i>Pdgfa</i> | Mouse   | m <i>Pdgfa</i> -Sybr For | GAGGAAGCCGAGATACCCC        | Real-time PCR |
|              |         | m <i>Pdgfa</i> -Sybr Rev | TGCTGTGGATCTGACTTCGAG      |               |
| <i>Pdgfb</i> | Mouse   | m <i>Pdgfb</i> -Sybr For | CATCCGCTCCTTTGATGATCTT     | Real-time PCR |
|              |         | m <i>Pdgfb</i> -Sybr Rev | GTGCTCGGGTCATGTTCAAGT      |               |
| <i>Vegfa</i> | Mouse   | m <i>Vegfa</i> -Sybr For | GCACATAGAGAGAATGAGCTTCC    | Real-time PCR |
|              |         | m <i>Vegfa</i> -Sybr Rev | CTCCGCTCTGAACAAGGCT        |               |
| <i>Vegfb</i> | Mouse   | m <i>Vegfb</i> -Sybr For | GCCAGACAGGGTTGCCATAC       | Real-time PCR |
|              |         | m <i>Vegfb</i> -Sybr Rev | GGAGTGGGATGGATGATGTCAG     |               |
| <i>Sp1</i>   | Mouse   | m <i>Sp1</i> -Sybr For   | CCTATTGCAAAGACAGTGAG       | Real-time PCR |
|              |         | m <i>Sp1</i> -Sybr Rev   | CTTGATGTGACAAATGTGCTG      |               |
| <i>Erg1</i>  | Mouse   | m <i>Erg1</i> -Sybr For  | TCCTCAAGGGGAGCCGAGCG       | Real-time PCR |
|              |         | m <i>Erg1</i> -Sybr Rev  | TGTTGCCACTGTTGGGTGCGG      |               |
| <i>Gapdh</i> | Mouse   | m <i>Gapdh</i> -Sybr For | AGGTCGGTGTGAACGGATTTG      | Real-time PCR |
|              |         | m <i>Gapdh</i> -Sybr Rev | TGTAGACCATGTAGTTGAGGTCA    |               |
| <i>SMAD1</i> | Human   | h <i>SMAD1</i> -Sybr For | TTGGTTCCAAGCAGAAGGAGGTCT   | Real-time PCR |
|              |         | h <i>SMAD1</i> -Sybr Rev | AACTGAGCTAAGAGGCTGTGCTGA   |               |
| <i>SMAD5</i> | Human   | h <i>SMAD5</i> -Sybr For | TTGGTGGAGAGGTGTATGCGGAAT   | Real-time PCR |
|              |         | h <i>SMAD5</i> -Sybr Rev | ACAGATTGAGCCAGAAGCTGAGCA   |               |
| <i>PDGFA</i> | Human   | h <i>PDGFA</i> -Sybr For | TCGATGAGATGGAGGGTCCG       | Real-time PCR |
|              |         | h <i>PDGFA</i> -Sybr Rev | ACCCGGACAGAAATCCAGTCT      |               |
| <i>PDGFB</i> | Human   | h <i>PDGFB</i> -Sybr For | TGGGCCTCGGGGACCCCAT        | Real-time PCR |

|               |       |                                                                                  |                                                                                              |               |
|---------------|-------|----------------------------------------------------------------------------------|----------------------------------------------------------------------------------------------|---------------|
| <i>GAPDH</i>  | Human | h <i>PDGFB</i> -Sybr Rev<br>h <i>GAPDH</i> -Sybr For<br>h <i>GAPDH</i> -Sybr Rev | CGTGCAGCAGGCGTTGGAGA<br>GGACCTGACCTGCCGTCTAGAA<br>GGTGTCGCTGTTGAAGTCAGAG                     | Real-time PCR |
| <i>SPI</i>    | Human | h <i>SPI</i> -Sybr For<br>h <i>SPI</i> -Sybr Rev                                 | TTGAAAAAGGAGTTGGTGGC<br>TGCTGGTTCTGTAAGTTGGG                                                 | Real-time PCR |
| <i>SMAD1</i>  | Human | h <i>SMAD1</i> - For<br>h <i>SMAD1</i> - Rev                                     | GCTCAGTTATTGGCACAGTCT<br>GGTCAAGTATTATCAAGGCTCC                                              | PCR           |
| <i>SMAD5</i>  | Human | h <i>SMAD5</i> - For<br>h <i>SMAD5</i> - Rev                                     | CCAGTTCAGAAATTTGGCATTG<br>GCACTGTCAGTACTATAAAG                                               | PCR           |
| <i>PDGFA</i>  | Human | h <i>PDGFA</i> - For<br>h <i>PDGFA</i> - Rev                                     | CCCCTGCCCATTCGGAGGAAGAG<br>AAGTTGGCGGACGTGGGGTCGA                                            | PCR           |
| <i>PDGFB</i>  | Human | h <i>PDGFB</i> - For<br>h <i>PDGFB</i> - Rev                                     | GATCCGCTCCTTTGATGATC<br>GTCTCACACTTGCATGCCAG                                                 | PCR           |
| <i>PDGFRA</i> | Human | h <i>PDGFRA</i> - For<br>h <i>PDGFRA</i> - Rev                                   | ATCAATCAGCCCAGATGGAC<br>TTCACGGGCAGAAAGGTACT                                                 | PCR           |
| <i>PDGFRB</i> | Human | h <i>PDGFRB</i> - For<br>h <i>PDGFRB</i> - Rev                                   | AATGTCTCCAGCACCTTCGT<br>AGCGGATGTGGTAAGGCATA                                                 | PCR           |
| <i>BMPRI1</i> | Human | h <i>BMPRI1</i> - For<br>h <i>BMPRI1</i> - Rev                                   | AGCACCAGAGGATACCTTGC<br>AATGAGCAAAACCAGCCATA                                                 | PCR           |
| <i>BMPRI2</i> | Human | h <i>BMPRI2</i> - For<br>h <i>BMPRI2</i> - Rev                                   | GTTGTAAATGCCACCACCATT<br>GTCTGGTTTCTTGTCTTTTAT                                               | PCR           |
| <i>ACVR1</i>  | Human | h <i>ACVR1</i> - For<br>h <i>ACVR1</i> - Rev                                     | TTCCACCTCCTGACACAACA<br>GGCAATGTTGTCATGTTCCA                                                 | PCR           |
| <i>ACVR2A</i> | Human | h <i>ACVR2A</i> - For<br>h <i>ACVR2A</i> - Rev                                   | GCATTCCCAGAGCACCAATC<br>CTGTGAGTCTTGCGGATGGA                                                 | PCR           |
| <i>BMP2</i>   | Human | h <i>BMP2</i> - For<br>h <i>BMP2</i> - Rev                                       | TCCTGCTCTATTCCTTGGTG<br>CTTCATTCCAGGCAAAGTGT<br>AACGGACATTCGGTCCTTGC<br>CGCAACTCGAACTCGCTCAG | PCR           |

|              |       |                         |                                   |                           |
|--------------|-------|-------------------------|-----------------------------------|---------------------------|
| <i>BMP4</i>  | Human | <i>hBMP4</i> - For      | TGAGCCTTTCCAGCAAGTTT              | PCR                       |
|              |       | <i>hBMP4</i> - Rev      | CCAGACTGAAGCCGGTAAAG              |                           |
| <i>BMP7</i>  | Human | <i>hBMP7</i> - For      | TTCCCCTCCCTATCCCCAACTTT           | PCR                       |
|              |       | <i>hBMP7</i> - Rev      | TTTTCTTTTCGCACAGACACC             |                           |
| <i>PBGD</i>  | Human | <i>hPBGD</i> - For      | ACACAGCCTACTTTCCAAGCGGAGCCAT      | PCR                       |
|              |       | <i>hPBGD</i> - Rev      | TCTTGTCCCCTGTGGTGGACATAGCAAT      |                           |
| <i>PDGFA</i> | Human | <i>hPDGFA</i> pro-For   | AGGATTGCAGCTGGCACTGGAGGG          | ChIP                      |
|              |       | <i>hPDGFA</i> pro-Rev   | CCCGCCTCCCCCGGATTCCGG             |                           |
| Neg Con      |       | Neg Con -For            | GGGAACCAGGGAAAGAGGA               | ChIP                      |
|              |       | Neg Con -For            | GGGAAATAGGCACCCGATAA              |                           |
| SP1          | Human | <i>hSP1</i> pro- For    | TGCGGGTCCCAGGCCCGGAAT             | ChIP                      |
|              |       | <i>hSP1</i> pro- Rev    | GGCGGCGGGGAGAGGGTTATA             |                           |
| <i>SMAD1</i> | Human | <i>hSMAD1</i> -MTH- For | TATTCTAGAATGAATGTGACAAGTTTATTTTCC | Cloning into pACT vector  |
|              |       | <i>hSMAD1</i> -MTH- Rev | ATAGGTACCAGATACAGATGAAATAGGATTA   |                           |
| <i>SMAD5</i> | Human | <i>hSMAD5</i> -MTH- For | TATTCTAGAATGACGTCAATGGCCAGCTTG    | Cloning into pACT vector  |
|              |       | <i>hSMAD5</i> -MTH- Rev | ATAGGTACCTTATGAAACAGAAGATATGGGGTT |                           |
| <i>SP1</i>   | Human | <i>hSP1</i> -MTH- For   | TATTCTAGA ATGAGCGACCAAGATCACTCCA  | Cloning into pBIND vector |
|              |       | <i>hSP1</i> -MTH- Rev   | ATAGGTACCTCAGAAGCCATTGCCACTGATA   |                           |
| <i>PDGFA</i> | Human | <i>hPDGFA</i> -mutA-For | GGAATCCGGGGCTGGCGGGGGGGG          | Site-directed mutagenesis |
|              |       | <i>hPDGFA</i> -mutA-Rev | CCCCCCCCGCCAGCCCCGGATTCC          |                           |

91

92

93

94

95
